# Supplementary material for: Five linguistic misrepresentations of Huntington’s disease
Source: publisher site journal article supplement (doi:10.1515/ohe-2025-0070), 2025-01-01
Supplement: Supplementary file 1 [file ohe-2025-0070_sm.xlsx]

## Sheet: Huntington's Disease
Year	Authors	Affiliations	Journal / Conference proceedings / Book chapter	Publisher	DOI	URL	PubMed	TPs	Total TP mentions
2024	Abdulsahib and Al-Radeef	Iraq	Journal of Advanced Pharmaceutical Technology & Research	Wolters Kluwer - Medknow	10.4103/JAPTR.JAPTR_496_23	https://journals.lww.com/japtr/fulltext/2024/15020/effect_of_quercetin_against_pilocarpine_induced.1.aspx	https://pubmed.ncbi.nlm.nih.gov/38903552/	HA	1
2024	Mubeen et al.	Pakistan	Irish Journal of Medical Science	Springer Nature	10.1007/s11845-024-03721-6	https://link.springer.com/article/10.1007/s11845-024-03721-6	https://pubmed.ncbi.nlm.nih.gov/38833116/	HiL, HiN	2
2023	Altalbe and Javed	Lebanon, Saudi Arabia	Computer Systems Science and Engineering	Tech Science Press	10.32604/csse.2023.040624	https://www.techscience.com/csse/v47n2/53669	No	HiL	1
2023	Jain et al.	India, Iran, Malaysia	Biomedicines	MDPI	10.3390/biomedicines11010162	https://www.mdpi.com/2227-9059/11/1/162	https://pubmed.ncbi.nlm.nih.gov/36672670/	HA	1
2023	Venkata Narayana	India	Future Journal of Pharmaceuticals and Health Sciences	Pharma Springs Publication	10.26452/fjphs.v3i1.336	https://pharmasprings.com/fjphs/article/view/336	No	HA	1
2021	Jarso	Ethiopia	Cancer Medicine Journal	Tridha Scholars	None	https://www.tridhascholars.org/pdfs/application-of-gene-therapy-towards-treatment-of-cancer-potentials-and-future-developments-CMJ-04-1036.pdf	No	HM	2
2020	Gupta et al.	Australia, Brazil, India, Malaysia	Role of Oxidative Stress in Pathophysiology of Diseases (book)	Springer Nature	10.1007/978-981-15-1568-2_4	https://link.springer.com/chapter/10.1007/978-981-15-1568-2_4	No	HiL	1
2020	John et al.	Nigeria	GSC Biological and Pharmaceutical Sciences	GSC Online Press	10.30574/gscbps.2020.11.2.0143	https://gsconlinepress.com/journals/gscbps/content/functional-foods-and-bioactive-compounds-roles-prevention-treatment-and-management	No	HA, HS	3
2020	Moon et al.	India	Research Journal of Pharmacy and Technology	A and V Publication	10.5958/0974-360X.2020.00874.4	https://rjptonline.org/AbstractView.aspx?PID=2020-13-10-77	No	HiL, HM, HS	14
2020	Murugan	India	Proceedings of the 2nd International Conference on Communication, Devices and Computing	Springer Nature	10.1007/978-981-15-0829-5_45	https://link.springer.com/chapter/10.1007/978-981-15-0829-5_45	No	HA	1
2020	Nandini et al.	India	IP Indian Journal of Neurosciences	Innovative Publication	10.18231/j.ijn.2020.003	https://www.ijnonline.org/article-details/11271	No	HiN	1
2020	Usha and Kumar	India	Advances in Mathematics: Scientific Journal	Union of Researchers of Macedonia	10.37418/amsj.9.7.68	https://www.research-publication.com/amsj/uploads/papers/vol-09/iss-07/AMSJ-2020-N7-68.pdf	No	HM	1
2018	Jadoon and Malik	Pakistan	Biochemistry & Pharmacology	Longdom Publishing SL	10.4172/2167-0501.1000246	https://www.longdom.org/open-access/a-comprehensive-review-article-on-isoprostanes-as-biological-markers-2167-0501-1000246.pdf	No	HiL	1
2016	Avadhanam et al.	India	SpringerBriefs in Applied Sciences and Technology Next Generation DNA LedTechnologies	Springer Nature	10.1007/978-981-287-670-6	https://link.springer.com/book/10.1007/978-981-287-670-6	No	HiN	1
2016	Bhor	India	Asian Journal of Pharmaceutical and Clinical Research	Innovare Academic Sciences Pvt Ltd.	10.22159/ajpcr.2016.v9s3.14195	https://www.academia.edu/104590740	No	HM, HA	2
2012	Eslami et al.	Iran	The 16th International Electronic Conference on Synthetic Organic Chemistry	MDPI	10.3390/ecsoc-16-01115	https://sciforum.net/paper/view/1115	No	HM	1
